# Supplementary material
Source: PubMed Central journal article supplement (PMC7851296)

**Supplemental figure legend**

**Fig. S1 The GO analysis (A) and KEGG pathway (B) of the differentially expressed genes.**

# Fig. S1

## A

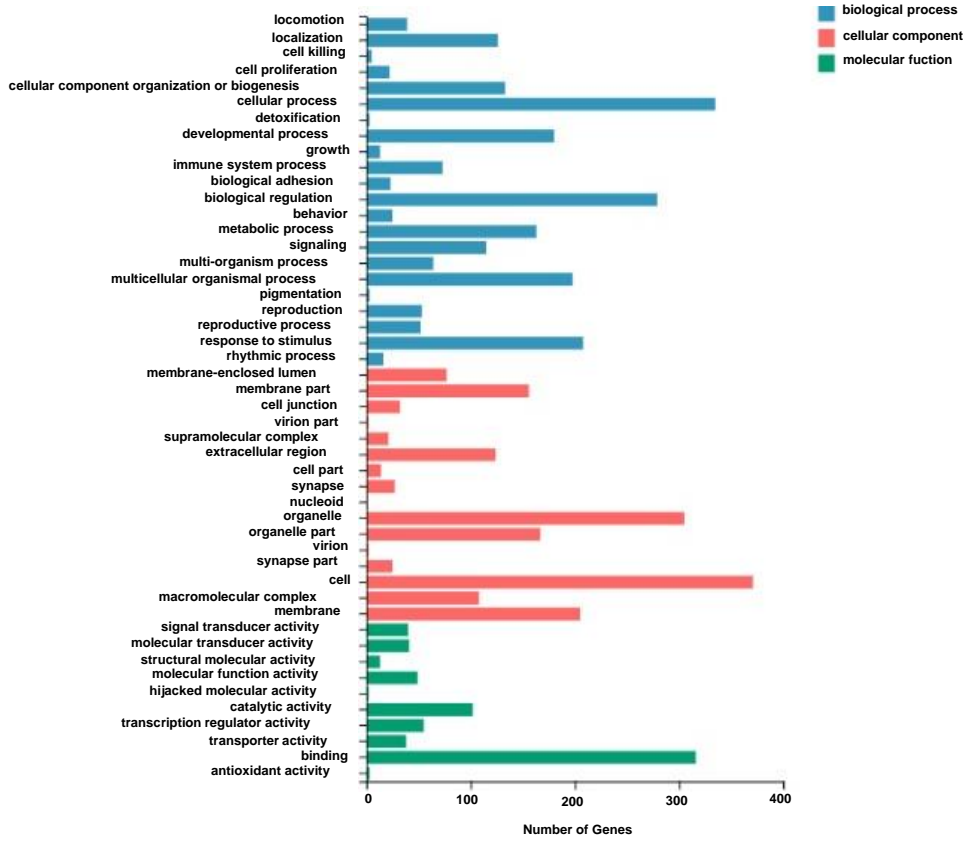

## B

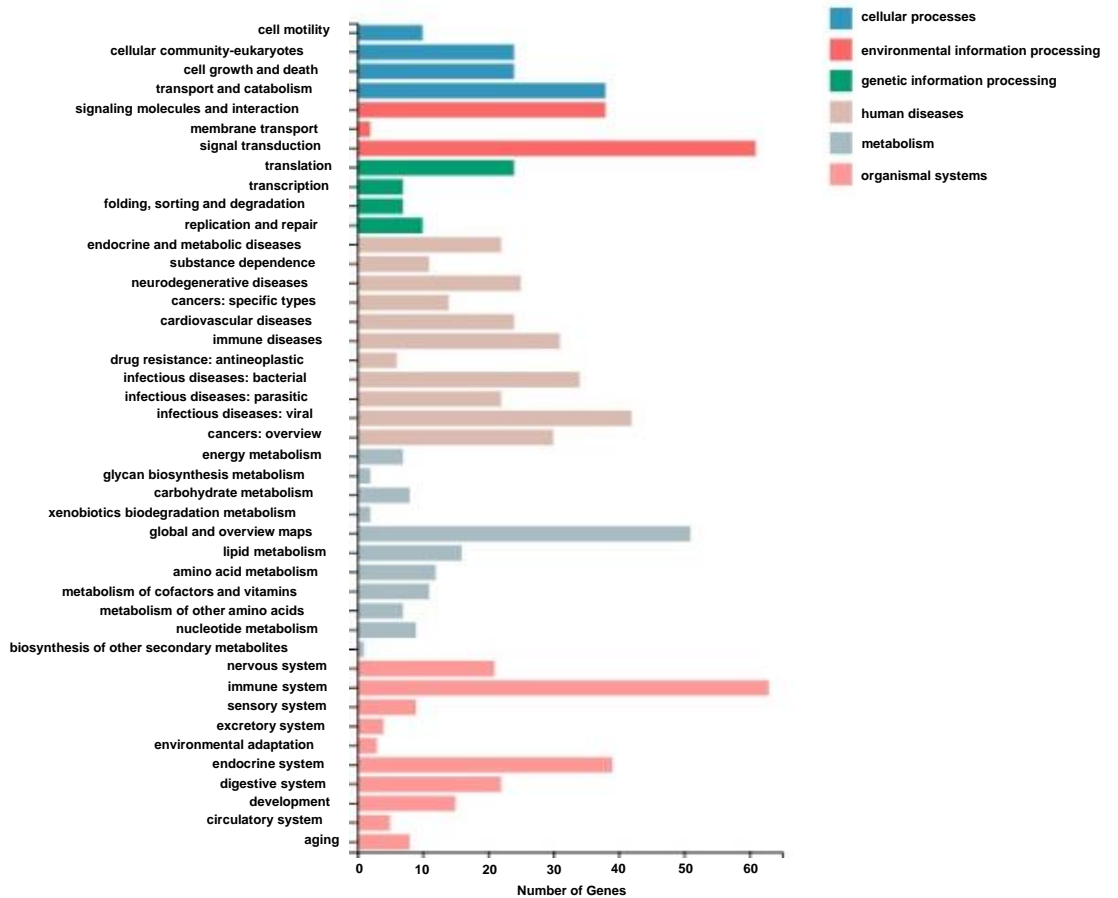

Supplement: 13311_2020_929_MOESM1_ESM.pdf [file 13311_2020_929_MOESM1_ESM.pdf]
